# Supplementary material for: PCA062, a P-cadherin Targeting Antibody–Drug Conjugate, Displays Potent Antitumor Activity Against P-cadherin–expressing Malignancies
Source: Oxford University Press journal article supplement (doi:10.1158/1535-7163.mct-20-0708), 2021-04-20
Supplement: 15357163mct200708-sup-249681_2_supp_6988661_qq19v9.xlsx [file 15357163mct200708-sup-249681_2_supp_6988661_qq19v9.xlsx]

## Sheet: Sheet1
Cell Line Name	IC50[IgG-SMCC-DM1]	IC50[PCA062]	IC50[PCA062]-IC50[IgG-SMCC-DM1]	PCA062.sensitivity	primarySite	RNASeq_Expr.ABCC1.TPM	RNASeq_Expr.SLC46A3.TPM	RNASeq_Expr.CDH3.TPM
BHY	0.00161973	0.0125206	0.0109009	Insensitive	upper_aerodigestive_tract	25.508	0.091	885.753
BICR16	0.000646	0.00405088	0.00340488	Insensitive	upper_aerodigestive_tract	26.951	1.02	342.123
BICR22	0.0033487	0.015276	0.0119273	Insensitive	upper_aerodigestive_tract	27.98	0.161	638.483
BICR56	0.0023269	0.0206365	0.0183096	Insensitive	upper_aerodigestive_tract	27.55	0.305	385.959
BICR6	0.00696989	0.00226683	-0.00470306	Sensitive	upper_aerodigestive_tract	21.08	4.79	511.747
CAL27	0.00131896	0.0131352	0.0118163	Insensitive	upper_aerodigestive_tract	42.475	0.276	361.655
CAL851	0.00063	0.000162	-0.000468	Sensitive	breast	18.948	5.519	405.977
COLO680N	0.0182678	0.0145527	-0.0037151	Sensitive	oesophagus	24.547	7.25	324.896
DETROIT562	0.000913	0.00325394	0.00234094	Insensitive	upper_aerodigestive_tract	37.756	2.079	159.524
ECGI10	0.000804	0.000348	-0.000456	Sensitive	oesophagus	33.281	4.772	268.432
FADU	0.000405	0.0075553	0.0071503	Insensitive	upper_aerodigestive_tract	49.85	4.949	139.244
HCC1143	0.00260833	0.00529273	0.0026844	Insensitive	breast	62.993	8.609	217.574
HCC1806	0.000341	0.000731	0.00039	Insensitive	breast	17.603	7.001	116.72
HCC1954	0.00064	6.69e-05	-0.0005731	Sensitive	breast	24.363	13.331	297.791
HCC38	0.00140146	7.92e-05	-0.00132226	Sensitive	breast	16.206	8.269	140.431
HCC70	0.00406419	0.00112162	-0.00294257	Sensitive	breast	24.955	22.706	335.418
HDQP1	0.0107971	0.03611	0.0253129	Insensitive	breast	25.713	2.776	153.325
HSC2	0.000565	0.000873	0.000308	Insensitive	upper_aerodigestive_tract	34.542	0.154	278.753
HSC3	0.00341496	0.0264802	0.0230652	Insensitive	upper_aerodigestive_tract	39.11	0.042	170.644
HSC4	0.00179043	0.0121691	0.0103787	Insensitive	upper_aerodigestive_tract	28.13	0.302	302.852
JIMT1	0.00294804	0.00963759	0.00668955	Insensitive	breast	34.288	2.435	275.638
KYSE140	0.00194607	0.0121879	0.0102419	Insensitive	oesophagus	57.844	1.633	203.867
KYSE150	0.00553351	0.0123774	0.00684389	Insensitive	oesophagus	19.942	0.071	407.594
KYSE180	0.00197632	0.00247035	0.000494022	Insensitive	oesophagus	55.119	0.221	226.821
KYSE270	0.000273	0.000508	0.000235	Insensitive	oesophagus	42.66	8.168	219.144
KYSE30	0.0185619	0.148661	0.130099	Insensitive	oesophagus	43.205	0.056	259.056
KYSE450	0.0116365	0.0409572	0.0293207	Insensitive	oesophagus	83.312	0.376	264.854
KYSE510	0.00264284	0.00602407	0.00338123	Insensitive	oesophagus	69.8	0.515	223.464
KYSE520	0.00611046	0.0210128	0.0149023	Insensitive	oesophagus	61.645	0.118	75.854
PECAPJ15	0.00838666	0.0364541	0.0280675	Insensitive	upper_aerodigestive_tract	46.11	4.234	302.998
PECAPJ34CLONE12	0.00567374	0.00111124	-0.0045625	Sensitive	upper_aerodigestive_tract	49.711	5.247	313.89
PECAPJ41CLONE2	0.0009	0.000524	-0.000376	Sensitive	upper_aerodigestive_tract	28.77	2.749	808.771
PECAPJ49	0.000356	0.00370888	0.00335288	Insensitive	upper_aerodigestive_tract	35.526	0.128	316.495
SCC15	0.0385448	0.032748	-0.00579678	Sensitive	upper_aerodigestive_tract	15.494	14.901	334.037
SCC25	0.00152111	0.0110618	0.00954073	Insensitive	upper_aerodigestive_tract	25.661	0.512	380.941
SCC4	0.00197413	0.00294421	0.000970084	Insensitive	upper_aerodigestive_tract	25.799	8.317	241.204
SCC9	0.00181624	0.0178348	0.0160185	Insensitive	upper_aerodigestive_tract	17.815	0.373	293.175
SNU1041	0.0112307	0.106462	0.0952314	Insensitive	upper_aerodigestive_tract	68.528	2.749	272.769
SNU1066	0.00352044	0.00462037	0.00109993	Insensitive	upper_aerodigestive_tract	23.392	2.373	402.674
SNU1076	0.00134504	0.00500669	0.00366166	Insensitive	upper_aerodigestive_tract	34.558	0.918	456.733
SNU1214	0.00546919	0.0628516	0.0573824	Insensitive	upper_aerodigestive_tract	97.522	0.127	163.105
SNU899	0.00239608	0.000424	-0.00197208	Sensitive	upper_aerodigestive_tract	23.004	6.858	388.809
TE10	0.000644	0.00256052	0.00191652	Insensitive	oesophagus	36.717	3.27	158.78
TE11	0.000858	0.00288099	0.00202299	Insensitive	oesophagus	84.336	0.473	247.598
TE5	0.000605	0.000292	-0.000313	Sensitive	oesophagus	37.226	4.754	320.858
YD10B	0.00292157	0.00599737	0.0030758	Insensitive	upper_aerodigestive_tract	44.384	0.135	191.028
YD38	0.00238344	0.0107741	0.00839067	Insensitive	upper_aerodigestive_tract	34.228	0.261	408.773
